# Supplementary material for: Vitrification and nanowarming enable long-term organ cryopreservation and life-sustaining kidney transplantation in a rat model
Source: PubMed Central journal article supplement (PMC10256770; doi:10.1038/s41467-023-38824-8), 2023-06-09
Supplement: 41467_2023_38824_MOESM3_ESM.pdf [file 41467_2023_38824_MOESM3_ESM.pdf]

## **Description of Additional Supplementary Files Document**

Supplementary Data 1- Summary of statistical treatment for each figure.
